# Supplementary material for: Metal doping of porous materials via a post-synthetic mechano-chemical approach: a general route to design low-loaded versatile catalytic systems
Source: Royal Society of Chemistry journal article supplement (doi:10.1039/d0cy01568g), 2021-01-01
Supplement: d0cy01568g1.pdf [file d0cy01568g1.pdf]

## SUPPORTING INFORMATION

### **Metal doping of porous materials via post-synthetic mechano-chemical approach: a general route to design low-loaded versatile catalytic systems**

M. Dolores Marquez-Medina,<sup>a</sup> Rafael Luque<sup>\*a,b</sup> Alina M. Balu<sup>a</sup>, Francisco Ivars-Barceló<sup>c,d</sup> and Carolina Carrillo-Carrión<sup>\*a</sup>

<sup>a</sup> Department of Organic Chemistry, University of Córdoba, Campus de Rabanales, Edificio Marie Curie, Ctra Nnal IV-A Km. 396, E-14014, Cordoba, (Spain).

<sup>b</sup> Peoples Friendship University of Russia (RUDN University), 6 Miklukho Maklaya str., 117198, Moscow, Russia

<sup>c</sup> Dept. Química Inorgánica y Química Técnica, Facultad de Ciencias, UNED, Paseo Senda del Rey, 9, 28040 Madrid, Spain

<sup>d</sup> Instituto de Catálisis y Petroleoquímica (ICP-CSIC), C/Marie Curie, 2, Cantoblanco, 28049 Madrid, Spain

\*Correspondence: Rafael Luque ([q62alsor@uco.es](mailto:q62alsor@uco.es)); Carolina Carrillo-Carrión ([carrillocarrion.carolina@gmail.com](mailto:carrillocarrion.carolina@gmail.com))

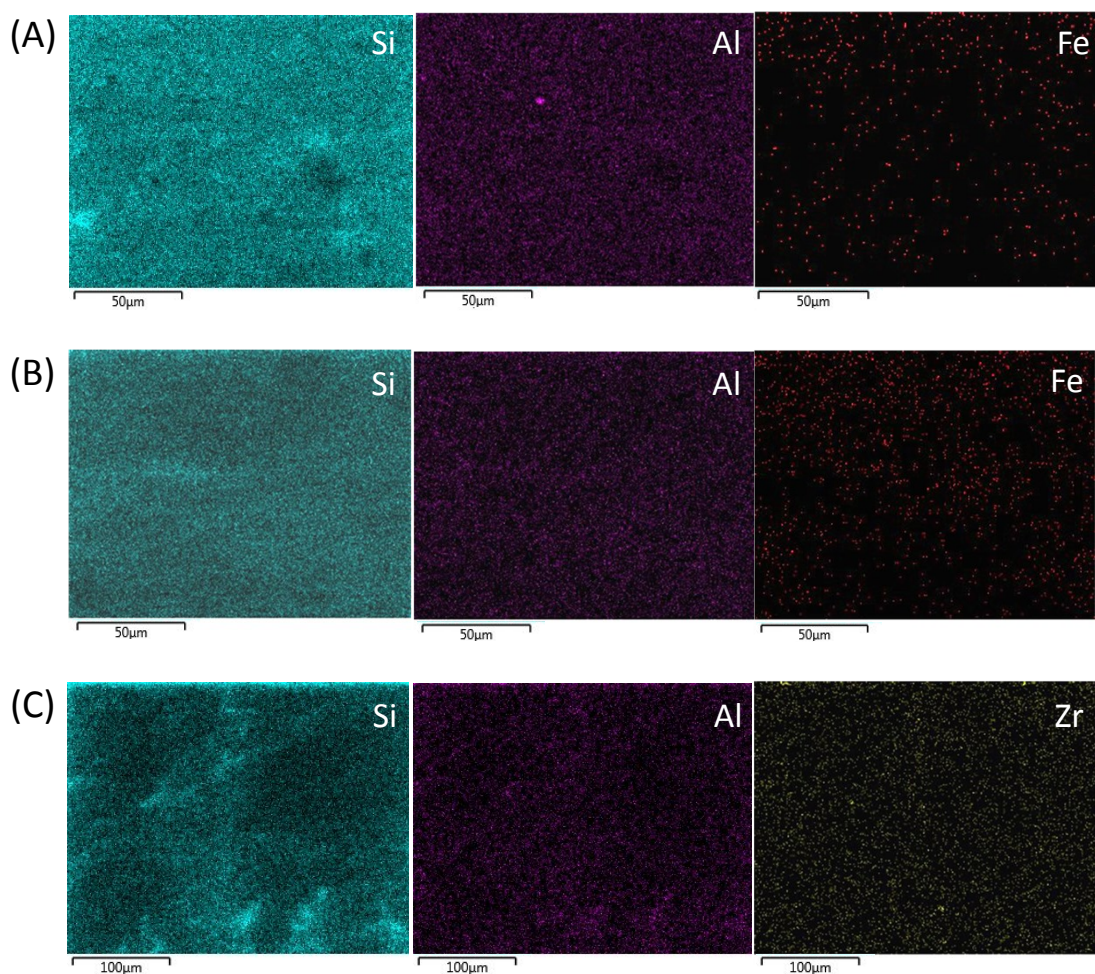

**Figure S1.** EDX elemental mapping profiles of (A) SBA15-Fe, (B) SBA15-FeMOF53, and (C) SBA-ZrMOF. Color code: Si (blue), Al (purple), Fe (red), Zr (yellow).

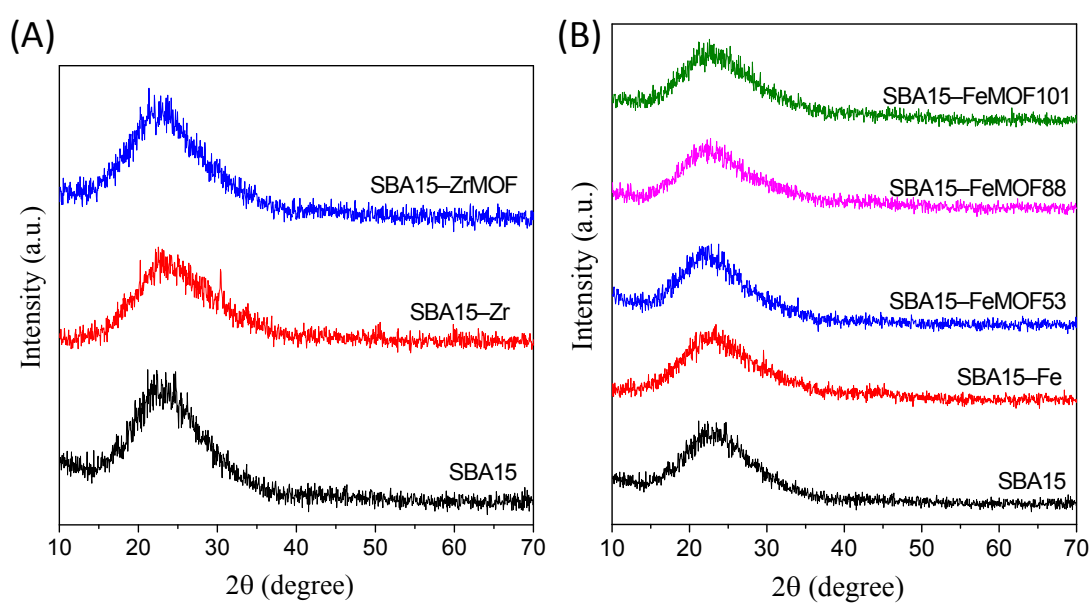

**Figure S2.** XDR spectra of the different (A) Zr-doped and (B) Fe-doped materials.

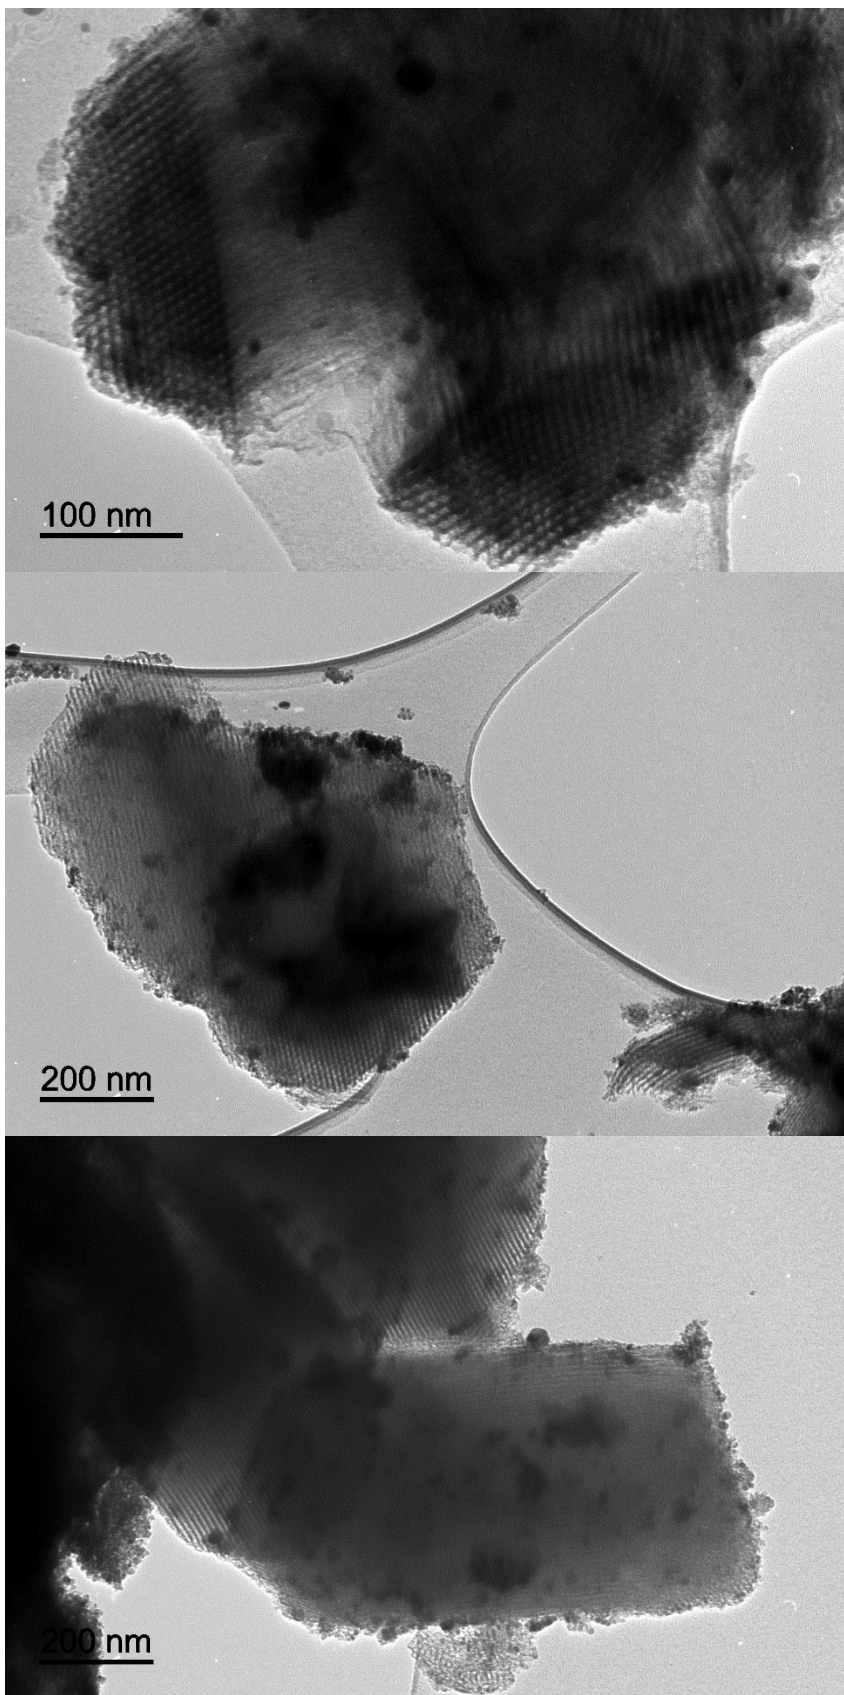

**Figure S3.** TEM images of SBA-MOF53 (top), SBA-MOF88 (middle), SBA-FeMOF101 (bottom)

**Table S1.** SEM/EDX and ICP-MS analyses of materials before and after their use for catalyzing the oxidation of isoeugenol to vanillin under optimized conditions. Elemental composition expressed in weight percentage (%).

| Catalyst            | SEM/EDX (%) |     |     |     | ICP-MS (%) |     |      |      |
|---------------------|-------------|-----|-----|-----|------------|-----|------|------|
|                     | Si          | Al  | Zr  | Fe  | Si         | Al  | Zr   | Fe   |
| SBA15-ZrMOF before  | 97.1        | 2.3 | 0.7 | -   | 78.7       | 4.5 | 0.85 | -    |
| SBA15-ZrMOF after   | 96.9        | 2.6 | 0.6 | -   | 72.6       | 4.3 | 0.82 | -    |
| SBA-FeMOF101 before | 97.3        | 2.5 | -   | 0.5 | 78.0       | 3.3 | -    | 0.80 |
| SBA-FeMOF101 after  | 97.3        | 2.4 | -   | 0.5 | 76.7       | 3.5 | -    | 0.82 |

**Table S2.** Catalytic performance of the different studied materials towards the oxidation of benzyl alcohol to benzaldehyde.<sup>a</sup>

| Catalyst       | Conversion (% mol) | Selectivity (% mol) |
|----------------|--------------------|---------------------|
| Blank          | 9.8                | 100                 |
| SBA15          | 10.0               | 100                 |
| MCM41          | 9.4                | 100                 |
| SBA15-Zr       | 39.3               | 100                 |
| SBA15-ZrMOF    | 29.6               | 100                 |
| MCM41-ZrMOF    | 33.2               | 100                 |
| SBA15-Fe       | 39.8               | 100                 |
| SBA15-FeMOF53  | 25.1               | 100                 |
| SBA15-FeMOF88  | 24.9               | 100                 |
| SBA15-FeMOF101 | 45.8               | 100                 |
| MCM41-Fe       | 41.1               | 100                 |
| MCM41-FeMOF53  | 39.4               | 100                 |
| SBA15-Al       | 18.0               | 100                 |
| SBA15-AlMOF    | 20.0               | 100                 |

<sup>a</sup>Reaction conditions: 1.9 mmol (0.2 mL) benzyl alcohol, 2.9 mmol (0.3 mL) of 30% (w/w) H<sub>2</sub>O<sub>2</sub> in water, 0.175 mol % catalyst (25 mg catalyst), and 2 mL of acetonitrile microwaved at 300 W, 90 °C for 3 min.

**Table S3.** Catalytic performance of the different studied materials towards the oxidation of isoeugenol to vanillin.<sup>a</sup>

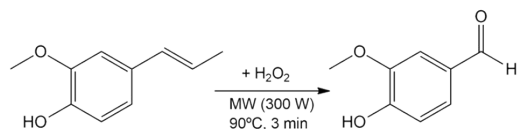

| Catalyst       | Conversion (% mol) | Selectivity (% mol) |
|----------------|--------------------|---------------------|
| Blank          | 7.3                | 2.2                 |
| SBA15          | 8.2                | 2.6                 |
| MCM41          | 14.7               | 7.7                 |
| SBA15-Zr       | 59.7               | 42.6                |
| SBA15-ZrMOF    | 38.0               | 21.6                |
| MCM41-ZrMOF    | 24.7               | 20.9                |
| SBA15-Fe       | 52.6               | 47.9                |
| SBA15-FeMOF53  | 42.9               | 43.7                |
| SBA15-FeMOF88  | 38.9               | 40.1                |
| SBA15-FeMOF101 | 60.9               | 43.9                |
| MCM41-Fe       | 31.9               | 22.8                |
| MCM41-FeMOF53  | 28.7               | 20.9                |
| SBA15-Al       | 25.0               | 16.0                |
| SBA15-AlMOF    | 27.0               | 27.0                |

<sup>a</sup>Reaction conditions: 1.2 mmol (0.2 mL) isoeugenol, 2.9 mmol (0.3 mL) of 30% (w/w) H<sub>2</sub>O<sub>2</sub> in water, 0.175 mol % catalyst (25 mg catalyst), and 2 mL of acetonitrile microwaved at 300 W, 90 °C for 3 min.
